# Supplementary material for: Safflower leaf ameliorates cognitive impairment through moderating excessive astrocyte activation in APP/PS1 mice
Source: Royal Society of Chemistry journal article supplement (doi:10.1039/d1fo01755a), 2021-01-01
Supplement: d1fo01755a6.pdf [file d1fo01755a6.pdf]

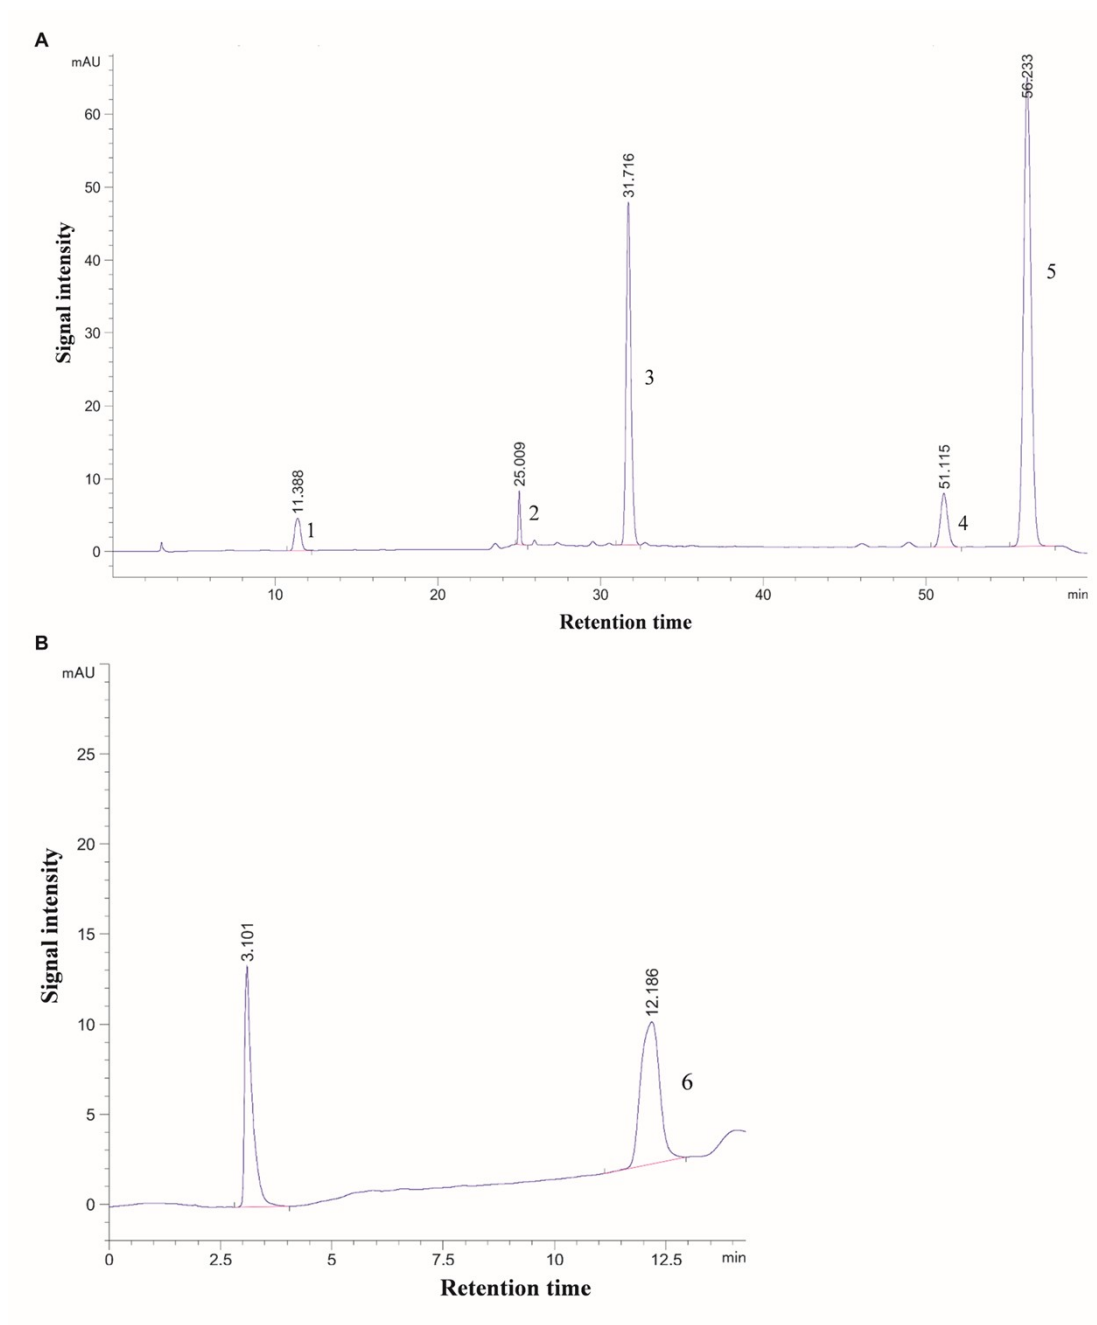

**Supplementary Fig. 1 HPLC chromatogram of six polyphenols in SLP.** (A) 1, ( $\pm$ )-catechin hydrate; 2, (-)-epicatechin gallate; 3, cymaroside; 4, quercetin; 5, luteolin: detection at 254 nm. (B) 6, (-)-galocatechin: detection at 210 nm.

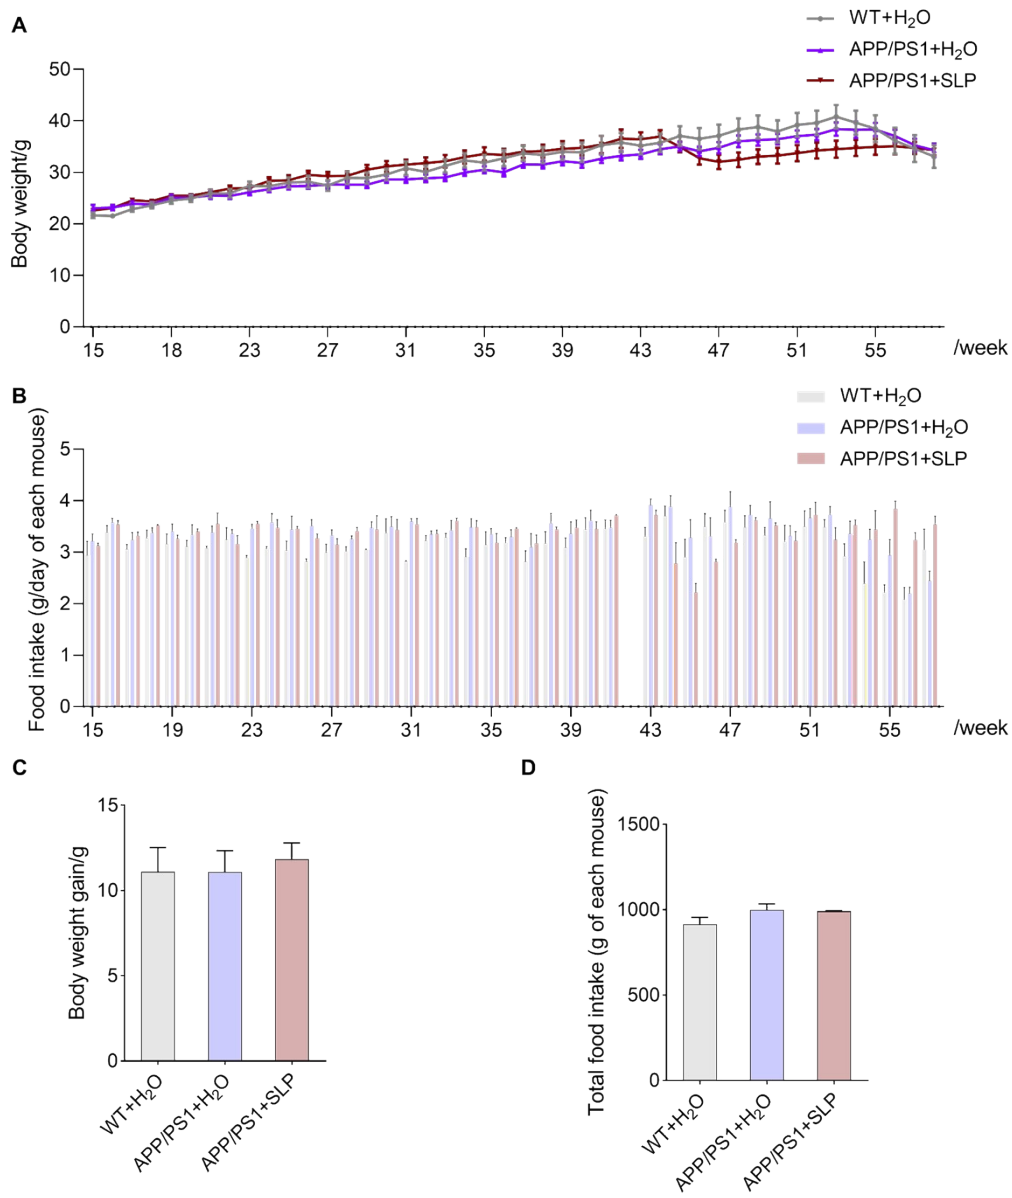

**Supplementary Fig. 2 Body weight gain and food intake.** Weekly body weight (A) and food intake (B) were recorded during the treatment. Because the mice did food-induced T maze test at 42-week, the food intake in 42-week-old mice was not recorded. Body weight gain (C) and total food intake (D) were calculated. Values represent the mean  $\pm$  SEM.

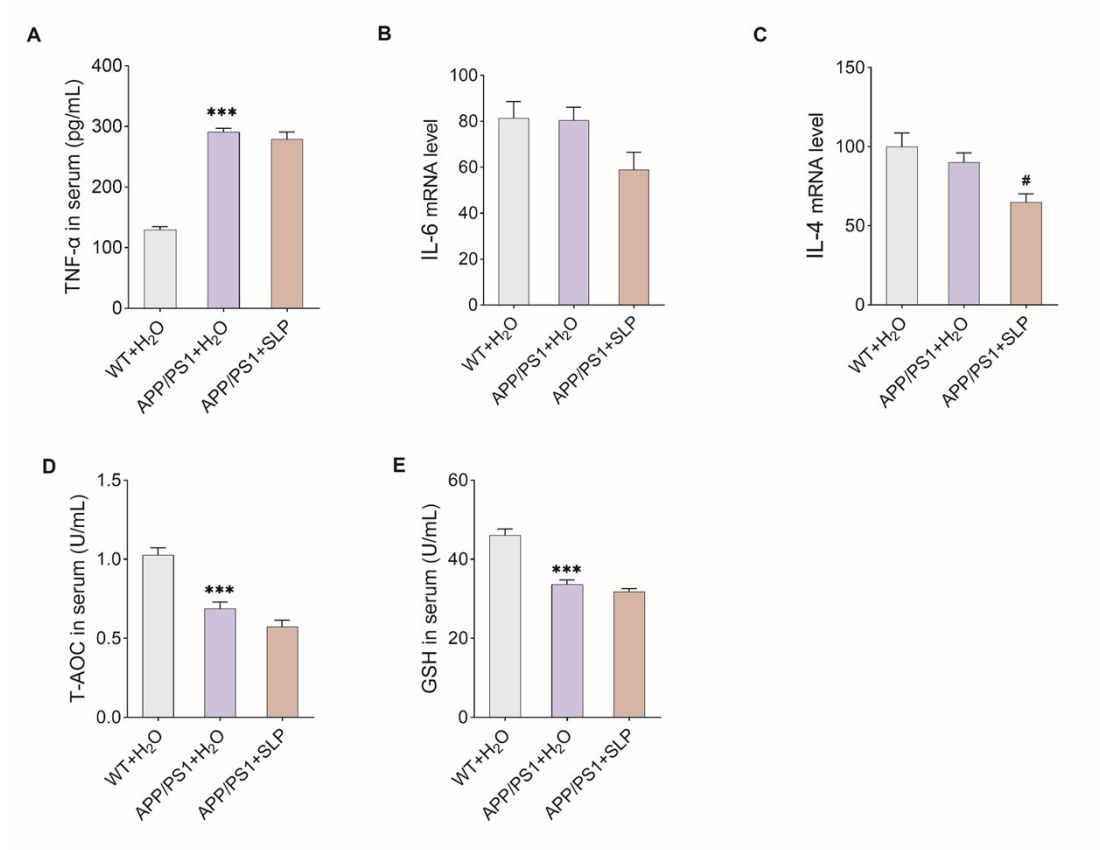

**Supplementary Fig. 3 Effect of SLP on inflammatory factors in the serum and brain of APP/PS1 mice.** (A) The level of TNF- $\alpha$  in the serum of WT+H<sub>2</sub>O, APP/PS1+H<sub>2</sub>O, and APP/PS1+SLP group mice, n = 8 per group. (B and C) mRNA levels of IL-4 (A) and IL-6 (B) in the cortex of WT+H<sub>2</sub>O, APP/PS1+H<sub>2</sub>O, and APP/PS1+SLP group mice. WT+H<sub>2</sub>O, n = 12; APP/PS1+H<sub>2</sub>O, n = 12; APP/PS1+SLP, n = 11. (D and E) The levels of T-AOC (D) and GSH (E) in the serum of mice, n = 8 per group. Values represent the mean  $\pm$  SEM. The results were analysed by one-way ANOVA. \*\*\* p < 0.001 vs WT+H<sub>2</sub>O group; # p < 0.05 vs APP/PS1+H<sub>2</sub>O group.

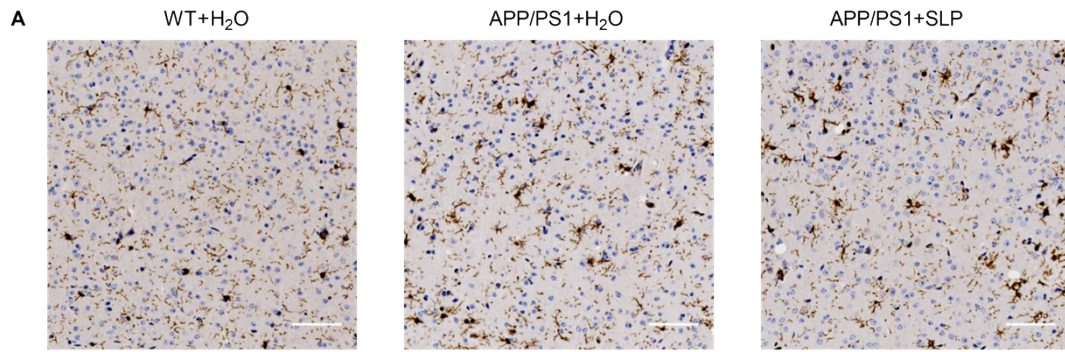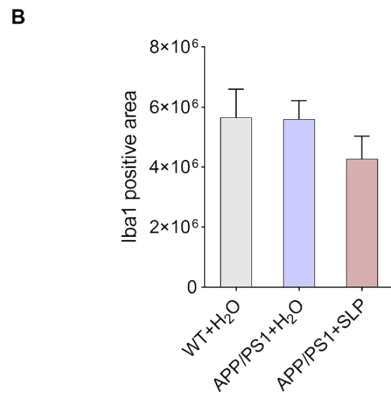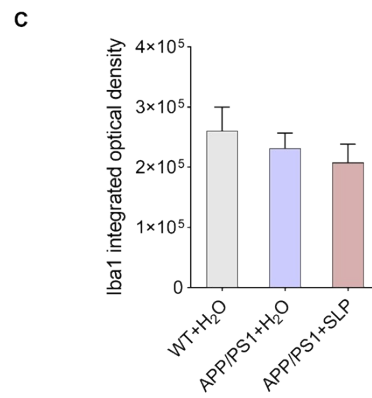

**Supplementary Fig. 4 Effect of SLP on microglia activation in APP/PS1 mice.** (A) Iba1 IHC in the brain. (B and C) Statistical analysis of Iba1 positive area (B) and integrated optical density (C), n = 6 per group. Values represent the mean ± SEM. The results were analysed by one-way ANOVA.

**Supplementary Table 1 Antibodies used in this study**

| Name           | Source                    | Cat.no    |
|----------------|---------------------------|-----------|
| 6E10           | Biologend                 | 803001    |
| $\beta$ -actin | Cell Signaling Technology | #3700     |
| BACE           | Cell Signaling Technology | #5606     |
| IDE            | Santa Cruz                | SC-393887 |
| CD10           | Santa Cruz                | SC-46656  |
| GFAP           | Sigma-Aldrich             | MAB360    |
| Iba1           | Wako                      | 019-19741 |
| NeuN           | Servicebio                | GB11138   |
| AQP4           | Sigma-Aldrich             | AB3594    |

**Supplementary Table 2 Primers for real-time PCR**

| Name           | Forward Sequence        | Reverse Sequence        |
|----------------|-------------------------|-------------------------|
| $\beta$ -actin | GGCTGTATTCCCCTCCATCG    | CCAGTTGGTAACAATGCCATGT  |
| IDE            | AATCCGGCCATCCAGAGAATA   | GGGTCTGACAGTGAACCTATGT  |
| NEP            | CTCTCTGTGCTTGCTTGCTC    | GACGTTGCGTTTCAACCAGC    |
| TNF- $\alpha$  | CCCTCACACTCAGATCATCTTCT | GCTACGACGTGGGCTACAG     |
| IL-6           | TAGTCCTTCCTACCCCAATTTC  | TTGGTCCTTAGCCACTCCTTC   |
| IL-4           | GGTCTCAACCCCAAGTAGT     | GCCGATGATCTCTCTCAAGTGAT |

**Supplementary Table 3 Levels of six polyphenols contained in SLP (mg/g)**

| <b>Compound</b>         | <b>Molecular formula</b>      | <b>Content</b> |
|-------------------------|-------------------------------|----------------|
| (±)-Catechin hydrate    | $C_{15}H_{14}O_6 \cdot xH_2O$ | 0.102          |
| (-)-Epicatechin gallate | $C_{22}H_{18}O$               | 0.0232         |
| Cynaroside              | $C_{21}H_{20}O_{11}$          | 3.92           |
| Quercetin               | $C_{15}H_{10}O_7$             | 1.15           |
| Luteolin                | $C_{15}H_{10}O_6$             | 2.61           |
| (-)-Gallocatechin       | $C_{15}H_{14}O_7$             | 0.025          |
