# Supplementary figures and images for: Safflower leaf ameliorates cognitive impairment through moderating excessive astrocyte activation in APP/PS1 mice
Source: Royal Society of Chemistry journal article supplement (doi:10.1039/d1fo01755a), 2021-01-01

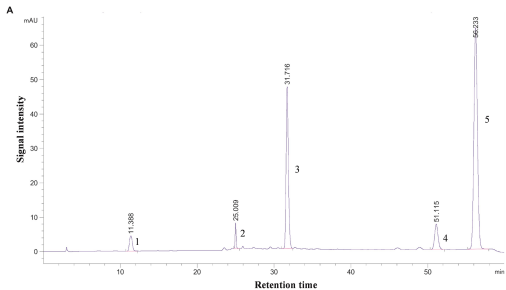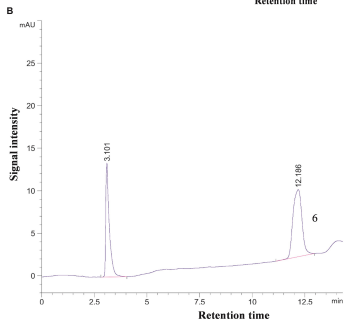

Supplement: d1fo01755a2.pdf [file d1fo01755a2.pdf]

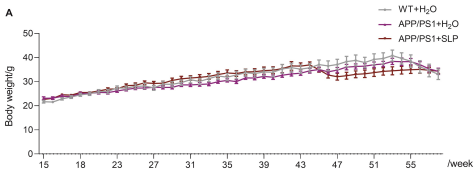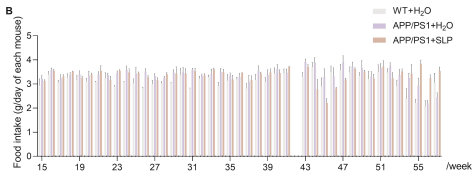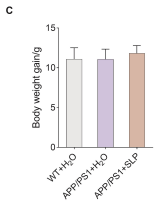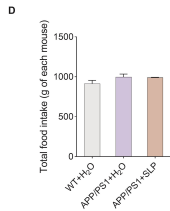

Supplement: d1fo01755a3.pdf [file d1fo01755a3.pdf]

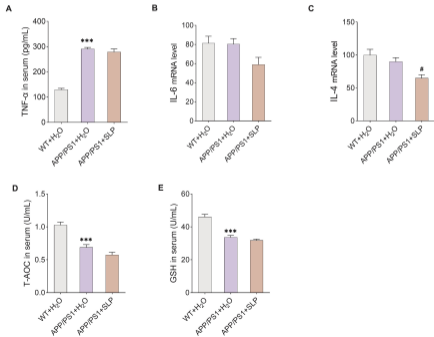

Supplement: d1fo01755a4.pdf [file d1fo01755a4.pdf]

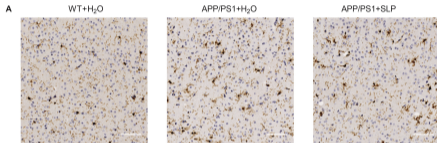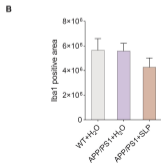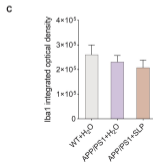

Supplement: d1fo01755a5.pdf [file d1fo01755a5.pdf]
